# Supplementary material for: Peptide‑Based Therapeutics Targeting the SLC39A14‑PIWIL2 Fusion in Hepatocellular Carcinoma
Source: Research Square preprint supplement (doi:10.21203/rs.3.rs-7217926/v1), 2025-08-14

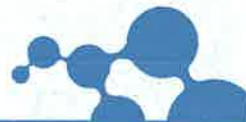

## HPLC REPORT

|                                                                |                                           |               |             |              |
|----------------------------------------------------------------|-------------------------------------------|---------------|-------------|--------------|
| <b>Product Name</b>                                            | FONB1 Peptide Synthesis                   |               |             |              |
| <b>Catalog Number</b>                                          | CSB-DT1054                                |               |             |              |
| <b>Sequence</b>                                                | <i>RQIKIWFQNRRMKWKKVQSPVPSQVNV</i>        |               |             |              |
| <b>Lot No</b>                                                  | M0906P11                                  |               |             |              |
| <b>Column</b>                                                  | Gemini-NX 5 $\mu$ C18 110A, 4.6*250mm     |               |             |              |
| <b>Solvent A</b>                                               | 0.1% Trifluoroacetic in 100% Acetonitrile |               |             |              |
| <b>Solvent B</b>                                               | 0.1% Trifluoroacetic in 100% Water        |               |             |              |
| <b>Purification</b>                                            | Affinity purified using IMAC              |               |             |              |
| <b>Gradient</b>                                                |                                           | A             | B           |              |
|                                                                | 0.01 min                                  | 25%           | 75%         |              |
|                                                                | 25 min                                    | 50%           | 50%         |              |
|                                                                | 25.1 min                                  | 100%          | 0%          |              |
|                                                                | 30 min                                    | STOP          |             |              |
| <b>Flow rate</b>                                               | 1.0 mL/min                                |               |             |              |
| <b>Wavelength</b>                                              | 220nm                                     |               |             |              |
| <b>Volume</b>                                                  | 20ul                                      |               |             |              |
| <b>Peak No.</b>                                                | <b>Ret Time</b>                           | <b>Height</b> | <b>Area</b> | <b>Conc.</b> |
| 1                                                              | 8.003                                     | 19242         | 111626      | 1.2525       |
| 2                                                              | 8.176                                     | 1206279       | 8519056     | 95.5849      |
| 3                                                              | 8.527                                     | 31023         | 281867      | 3.1626       |
| <b>Total</b>                                                   |                                           | 1256544       | 8912549     | 100          |
| <b>Purity</b>                                                  | 95.58%                                    |               |             |              |
| <b>Suggested Solvent<br/>(or solvent used in purification)</b> | 1.0 mg peptide dissolve with 1ml DMSO     |               |             |              |
| <b>Form</b>                                                    | Lyophilized powder                        |               |             |              |
| <b>Manufacture Date</b>                                        | 2023-9-6                                  |               |             |              |

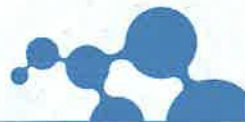

|                            |                                                                                                                                                                                                                                                                                                                                                                        |                                                  |
|----------------------------|------------------------------------------------------------------------------------------------------------------------------------------------------------------------------------------------------------------------------------------------------------------------------------------------------------------------------------------------------------------------|--------------------------------------------------|
| <b>Recommended Storage</b> | Short term                                                                                                                                                                                                                                                                                                                                                             | 4 °C, one week from the date of receipt          |
|                            | Long term                                                                                                                                                                                                                                                                                                                                                              | -20 to -80 °C, 6 months from the date of receipt |
| <b>Notes</b>               | <p>The shelf life is related to many factors, storage state, storage temperature and the stability of the peptide itself. The above shelf lives are concluded by our current storage experience. The specific shelf life will depend on specific peptide.</p> <p>Please use as soon as possible after receiving. Repeated freezing and thawing is not recommended.</p> |                                                  |

### MASS SPECTROMETRY REPORT

#### MASS Sample Description

|                           |                            |
|---------------------------|----------------------------|
| <b>Analyzed date</b>      | 2023-9-6                   |
| <b>Analyst</b>            | Shen                       |
| <b>Sample</b>             | CSB-DT1054                 |
| <b>M.W.</b>               | 3580.25Da                  |
| <b>Lot. No.</b>           | M0906P11                   |
| <b>Instrument</b>         | Agilent-6125B              |
| <b>Probe</b>              | ESI                        |
| <b>Nebulizer Gas Flow</b> | 1.5L/min                   |
| <b>CDL</b>                | -20.0v                     |
| <b>CDL Temp.</b>          | 250°C                      |
| <b>Block Temp.</b>        | 200°C                      |
| <b>Probe Bias</b>         | + 4.5kv                    |
| <b>Detector</b>           | 1.5kv                      |
| <b>T. Flow</b>            | 0.2ml/min                  |
| <b>B. Conc.</b>           | 50%H <sub>2</sub> O/50%ACN |

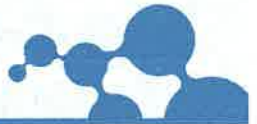

## MASS

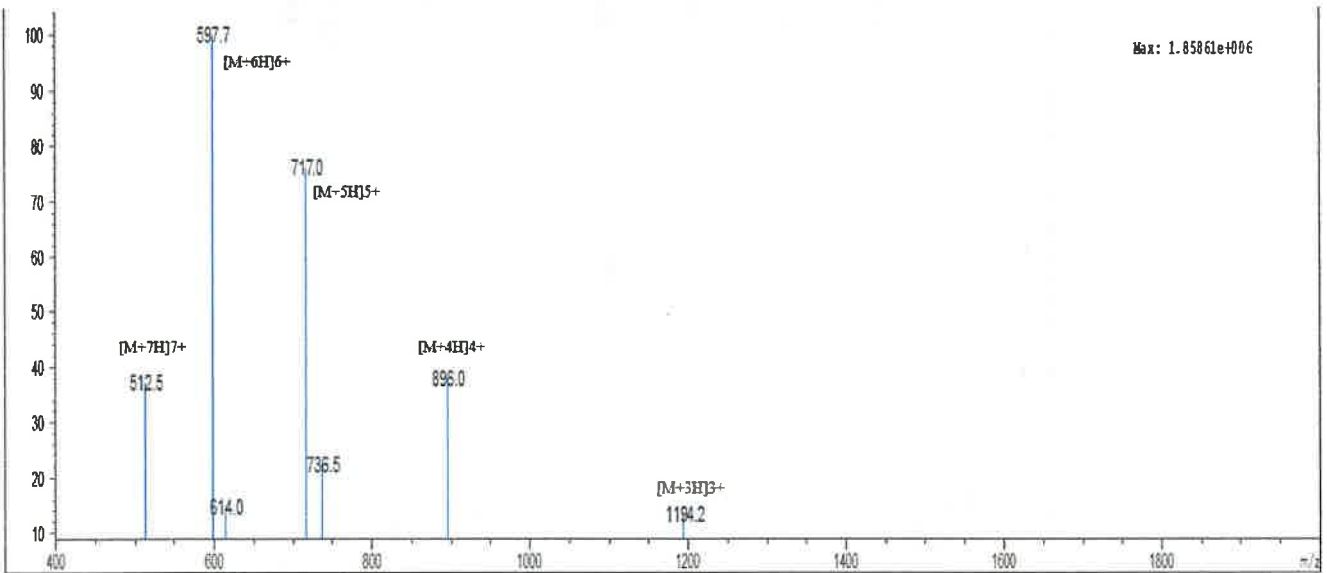

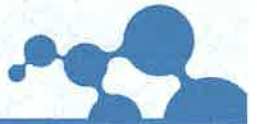

## HPLC

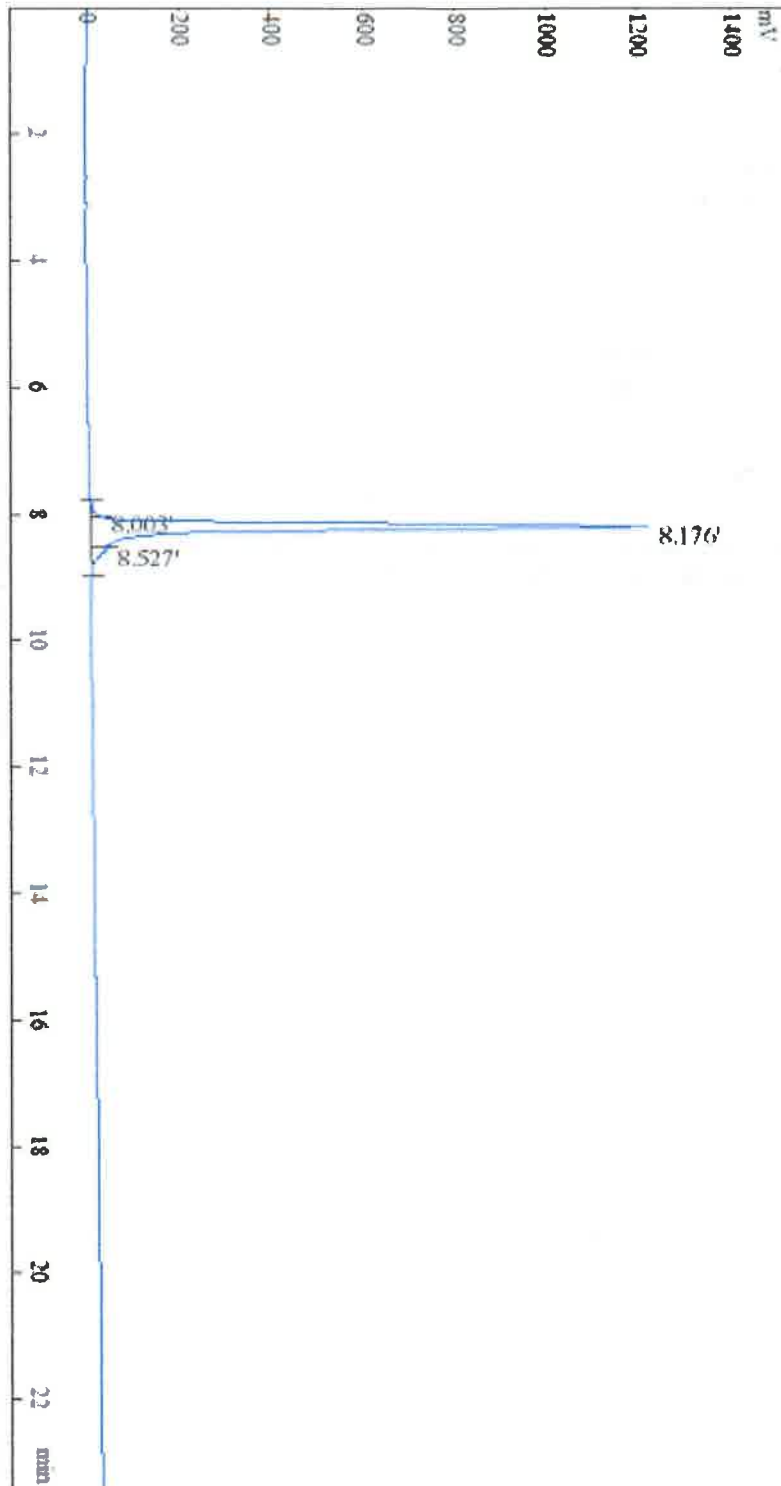

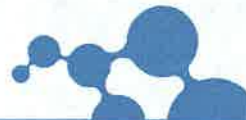

## HPLC REPORT

|                                                                |                                                |               |             |              |
|----------------------------------------------------------------|------------------------------------------------|---------------|-------------|--------------|
| <b>Product Name</b>                                            | FONB2 Peptide Synthesis                        |               |             |              |
| <b>Catalog Number</b>                                          | CSB-DT1055                                     |               |             |              |
| <b>Sequence</b>                                                | <i>RQIKIWFQNRMMKWKKQEIIVDSLKLSLVGSLKKFYEVN</i> |               |             |              |
| <b>Lot No</b>                                                  | M0920P2                                        |               |             |              |
| <b>Column</b>                                                  | Gemini-NX 5 $\mu$ C18 110A, 4.6*250mm          |               |             |              |
| <b>Solvent A</b>                                               | 0.1% Trifluoroacetic in 100% Acetonitrile      |               |             |              |
| <b>Solvent B</b>                                               | 0.1% Trifluoroacetic in 100% Water             |               |             |              |
| <b>Purification</b>                                            | Affinity purified using IMAC                   |               |             |              |
| <b>Gradient</b>                                                |                                                | A             | B           |              |
|                                                                | 0.01 min                                       | 20%           | 80%         |              |
|                                                                | 25 min                                         | 80%           | 20%         |              |
|                                                                | 25.1 min                                       | 100%          | 0%          |              |
|                                                                | 30 min                                         | STOP          |             |              |
| <b>Flow rate</b>                                               | 1.0 mL/min                                     |               |             |              |
| <b>Wavelength</b>                                              | 220nm                                          |               |             |              |
| <b>Volume</b>                                                  | 20ul                                           |               |             |              |
| <b>Peak No.</b>                                                | <b>Ret Time</b>                                | <b>Height</b> | <b>Area</b> | <b>Conc.</b> |
| 1                                                              | 11.251                                         | 2393          | 46737       | 0.6557       |
| 2                                                              | 11.852                                         | 6938          | 152700      | 2.1424       |
| 3                                                              | 12.206                                         | 433456        | 6872658     | 96.4265      |
| 4                                                              | 12.718                                         | 2101          | 55268       | 0.7754       |
| <b>Total</b>                                                   |                                                | 444888        | 7127363     | 100          |
| <b>Purity</b>                                                  | 96.43%                                         |               |             |              |
| <b>Suggested Solvent<br/>(or solvent used in purification)</b> | 1.0 mg peptide dissolve with 1ml DMSO          |               |             |              |
| <b>Form</b>                                                    | Lyophilized powder                             |               |             |              |
| <b>Manufacture Date</b>                                        | 2023-9-20                                      |               |             |              |

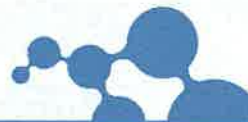

|                            |                                                                                                                                                                                                                                                                                                                                                                        |                                                  |
|----------------------------|------------------------------------------------------------------------------------------------------------------------------------------------------------------------------------------------------------------------------------------------------------------------------------------------------------------------------------------------------------------------|--------------------------------------------------|
| <b>Recommended Storage</b> | Short term                                                                                                                                                                                                                                                                                                                                                             | 4 °C, one week from the date of receipt          |
|                            | Long term                                                                                                                                                                                                                                                                                                                                                              | -20 to -80 °C, 6 months from the date of receipt |
| <b>Notes</b>               | <p>The shelf life is related to many factors, storage state, storage temperature and the stability of the peptide itself. The above shelf lives are concluded by our current storage experience. The specific shelf life will depend on specific peptide.</p> <p>Please use as soon as possible after receiving. Repeated freezing and thawing is not recommended.</p> |                                                  |

### MASS SPECTROMETRY REPORT

| MASS Sample Description   |                            |
|---------------------------|----------------------------|
| <b>Analyzed date</b>      | 2023-9-20                  |
| <b>Analyst</b>            | Shen                       |
| <b>Sample</b>             | CSB-DT1055                 |
| <b>M.W.</b>               | 4738.6Da                   |
| <b>Lot. No.</b>           | M0920P2                    |
| <b>Instrument</b>         | Agilent-6125B              |
| <b>Probe</b>              | ESI                        |
| <b>Nebulizer Gas Flow</b> | 1.5L/min                   |
| <b>CDL</b>                | -20.0v                     |
| <b>CDL Temp.</b>          | 250°C                      |
| <b>Block Temp.</b>        | 200°C                      |
| <b>Probe Bias</b>         | + 4.5kv                    |
| <b>Detector</b>           | 1.5kv                      |
| <b>T. Flow</b>            | 0.2ml/min                  |
| <b>B. Conc.</b>           | 50%H <sub>2</sub> O/50%ACN |

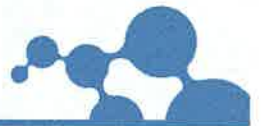

## HPLC

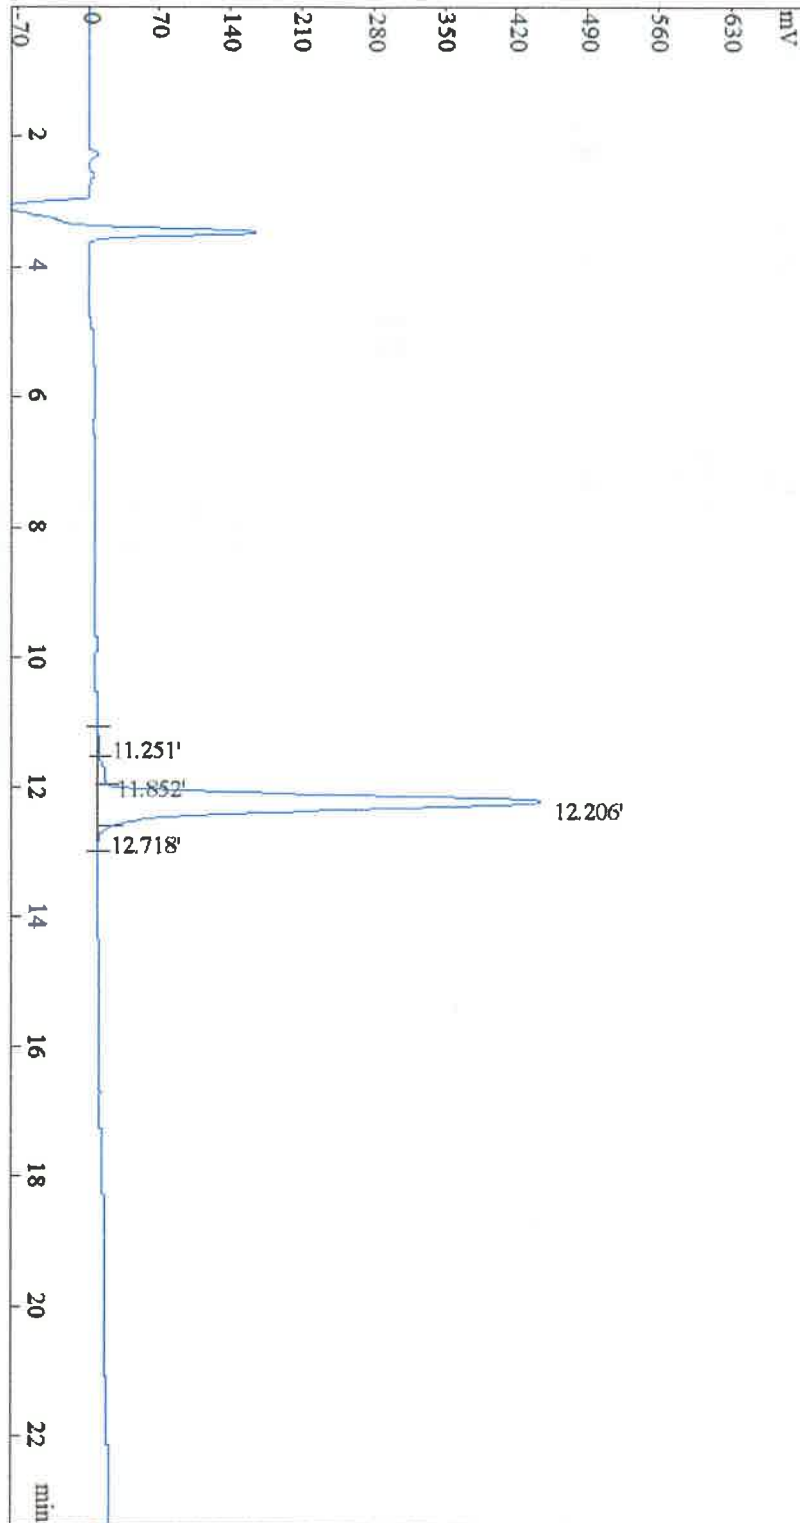

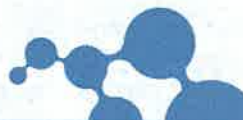

# MASS

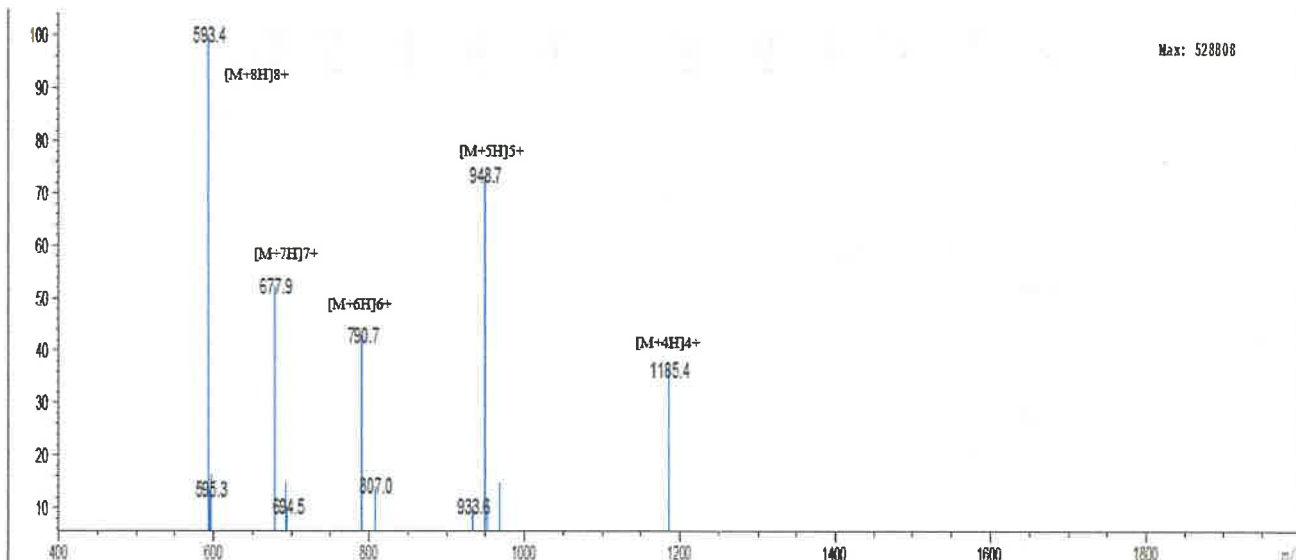



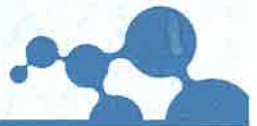

## HPLC REPORT

|                                                                |                                                |                                                            |             |              |
|----------------------------------------------------------------|------------------------------------------------|------------------------------------------------------------|-------------|--------------|
| <b>Product Name</b>                                            | Nep1 Peptide Synthesis                         |                                                            |             |              |
| <b>Catalog Number</b>                                          | CSB-DT1059                                     |                                                            |             |              |
| <b>Sequence</b>                                                | <i>RQIKIWFQNRRMKWKKRLVAMKFLRASEEHLKQHYIDLK</i> |                                                            |             |              |
| <b>Lot No</b>                                                  | M0913P1                                        |                                                            |             |              |
| <b>Column</b>                                                  | Gemini-NX 5 $\mu$ C18 110A, 4.6*250mm          |                                                            |             |              |
| <b>Solvent A</b>                                               | 0.1% Trifluoroacetic in 100% Acetonitrile      |                                                            |             |              |
| <b>Solvent B</b>                                               | 0.1% Trifluoroacetic in 100% Water             |                                                            |             |              |
| <b>Purification</b>                                            | Affinity purified using IMAC                   |                                                            |             |              |
| <b>Gradient</b>                                                |                                                | A                                                          | B           |              |
|                                                                | 0.01 min                                       | 25%                                                        | 75%         |              |
|                                                                | 25 min                                         | 50%                                                        | 50%         |              |
|                                                                | 25.1 min                                       | 100%                                                       | 0%          |              |
|                                                                | 30 min                                         | STOP                                                       |             |              |
| <b>Flow rate</b>                                               | 1.0 mL/min                                     |                                                            |             |              |
| <b>Wavelength</b>                                              | 220nm                                          |                                                            |             |              |
| <b>Volume</b>                                                  | 20ul                                           |                                                            |             |              |
| <b>Peak No.</b>                                                | <b>Ret Time</b>                                | <b>Height</b>                                              | <b>Area</b> | <b>Conc.</b> |
| 1                                                              | 9.303                                          | 391990                                                     | 4162116     | 96.9451      |
| 2                                                              | 9.783                                          | 15065                                                      | 131155      | 3.0549       |
| <b>Total</b>                                                   |                                                | 407055                                                     | 4293271     | 100          |
| <b>Purity</b>                                                  | 96.95%                                         |                                                            |             |              |
| <b>Suggested Solvent<br/>(or solvent used in purification)</b> | 1.0 mg peptide dissolve with 1ml DMSO          |                                                            |             |              |
| <b>Form</b>                                                    | Lyophilized powder                             |                                                            |             |              |
| <b>Manufacture Date</b>                                        | 2023-9-14                                      |                                                            |             |              |
| <b>Recommended Storage</b>                                     | Short term                                     | 4 $^{\circ}$ C, one week from the date of receipt          |             |              |
|                                                                | Long term                                      | -20 to -80 $^{\circ}$ C, 6 months from the date of receipt |             |              |

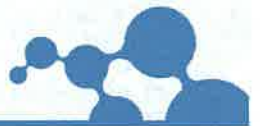**Notes**

The shelf life is related to many factors, storage state, storage temperature and the stability of the peptide itself. The above shelf lives are concluded by our current storage experience. The specific shelf life will depend on specific peptide.

Please use as soon as possible after receiving. Repeated freezing and thawing is not recommended.

**MASS SPECTROMETRY REPORT****MASS Sample Description**

| <b>MASS Sample Description</b> |                            |
|--------------------------------|----------------------------|
| <b>Analyzed date</b>           | 2023-9-14                  |
| <b>Analyst</b>                 | Shen                       |
| <b>Sample</b>                  | CSB-DT1059                 |
| <b>M.W.</b>                    | 5055.03Da                  |
| <b>Lot. No.</b>                | M0913P1                    |
| <b>Instrument</b>              | Agilent-6125B              |
| <b>Probe</b>                   | ESI                        |
| <b>Nebulizer Gas Flow</b>      | 1.5L/min                   |
| <b>CDL</b>                     | -20.0v                     |
| <b>CDL Temp.</b>               | 250°C                      |
| <b>Block Temp.</b>             | 200°C                      |
| <b>Probe Bias</b>              | + 4.5kv                    |
| <b>Detector</b>                | 1.5kv                      |
| <b>T. Flow</b>                 | 0.2ml/min                  |
| <b>B. Conc.</b>                | 50%H <sub>2</sub> O/50%ACN |

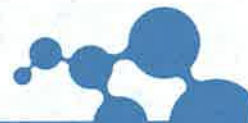

# MASS

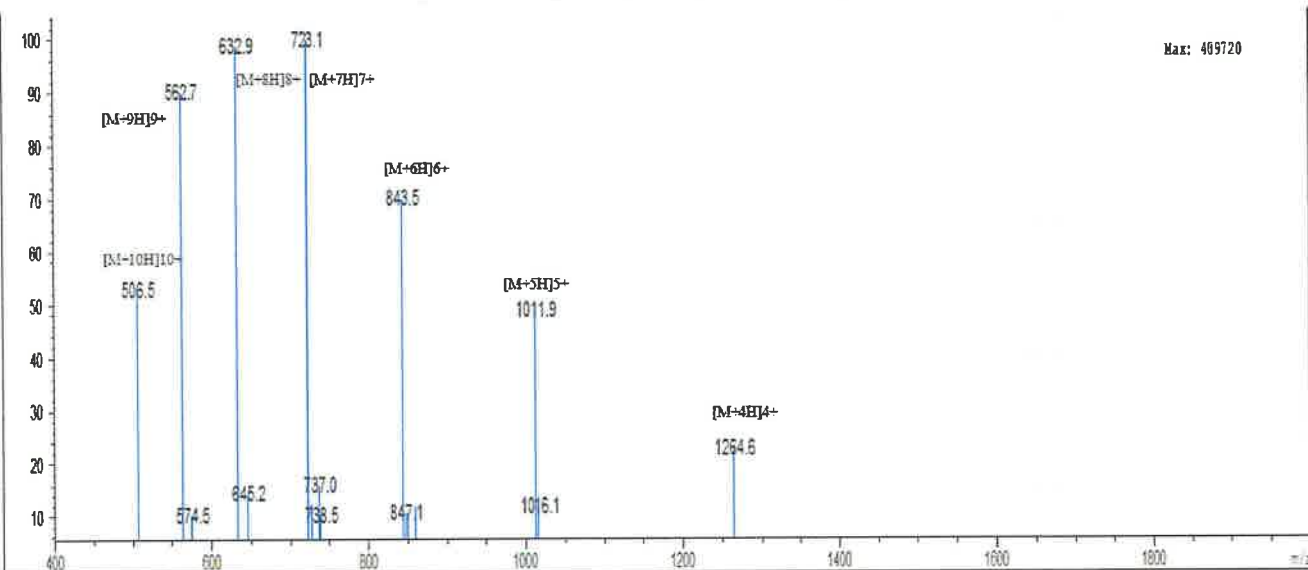

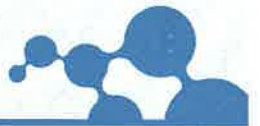

**HPLC**

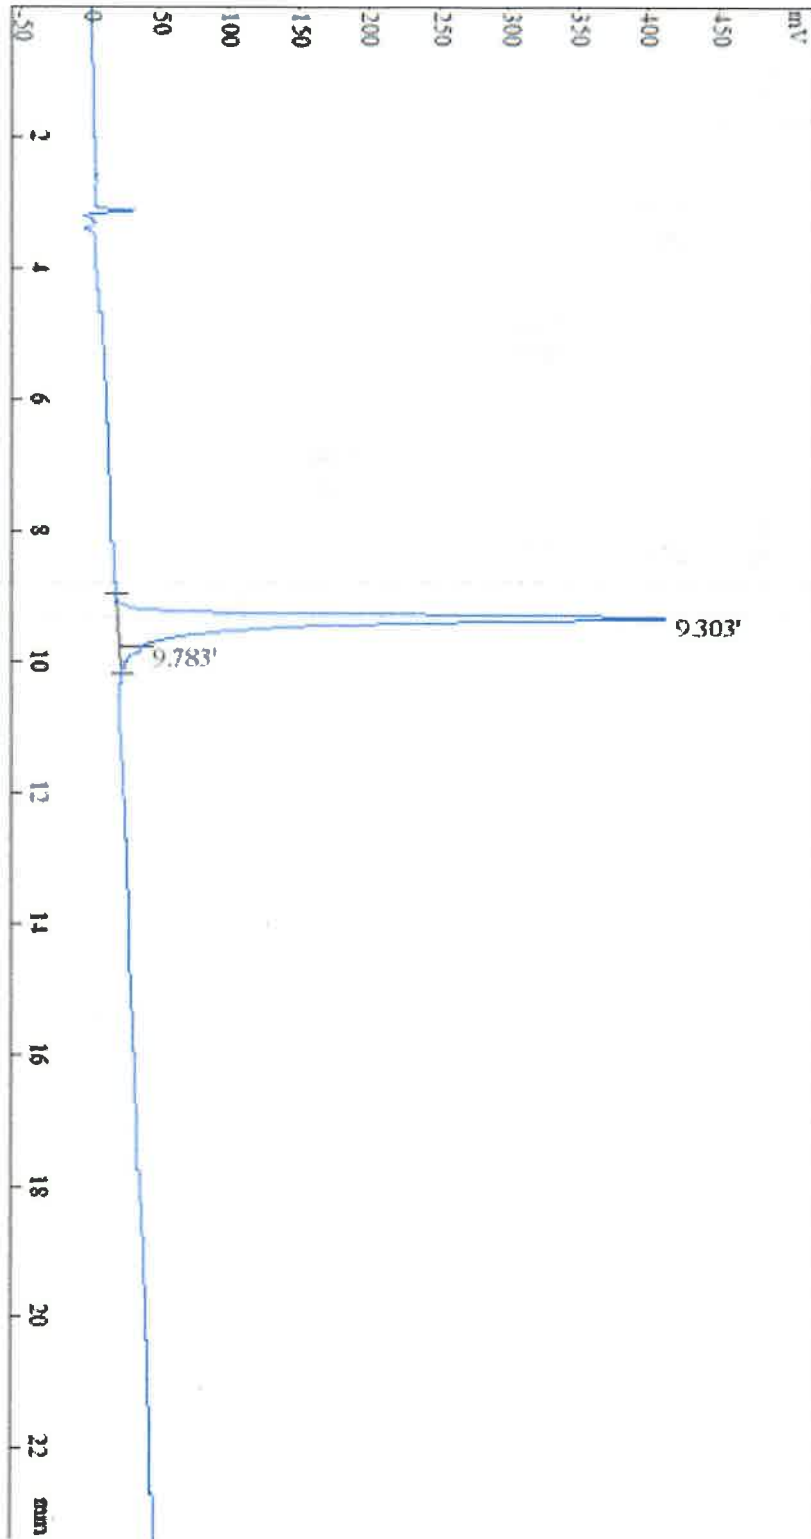

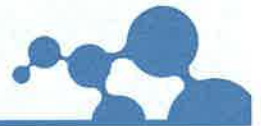

## HPLC REPORT

|                                                                |                                           |                                                   |             |              |
|----------------------------------------------------------------|-------------------------------------------|---------------------------------------------------|-------------|--------------|
| <b>Product Name</b>                                            | Hdep1 Peptide Synthesis                   |                                                   |             |              |
| <b>Catalog Number</b>                                          | CSB-DT1057                                |                                                   |             |              |
| <b>Sequence</b>                                                | RQIKIWFQNRRMKWKKSRQYLDQIRQTIFENLKMLN      |                                                   |             |              |
| <b>Lot No</b>                                                  | M0926P1                                   |                                                   |             |              |
| <b>Column</b>                                                  | Gemini-NX 5 $\mu$ C18 110A, 4.6*250mm     |                                                   |             |              |
| <b>Solvent A</b>                                               | 0.1% Trifluoroacetic in 100% Acetonitrile |                                                   |             |              |
| <b>Solvent B</b>                                               | 0.1% Trifluoroacetic in 100% Water        |                                                   |             |              |
| <b>Purification</b>                                            | Affinity purified using IMAC              |                                                   |             |              |
| <b>Gradient</b>                                                |                                           | A                                                 | B           |              |
|                                                                | 0.01 min                                  | 20%                                               | 80%         |              |
|                                                                | 25 min                                    | 80%                                               | 20%         |              |
|                                                                | 25.1 min                                  | 100%                                              | 0%          |              |
|                                                                | 30 min                                    | STOP                                              |             |              |
| <b>Flow rate</b>                                               | 1.0 mL/min                                |                                                   |             |              |
| <b>Wavelength</b>                                              | 220nm                                     |                                                   |             |              |
| <b>Volume</b>                                                  | 20ul                                      |                                                   |             |              |
| <b>Peak No.</b>                                                | <b>Ret Time</b>                           | <b>Height</b>                                     | <b>Area</b> | <b>Conc.</b> |
| 1                                                              | 12.425                                    | 10481                                             | 63413       | 0.6557       |
| 2                                                              | 12.734                                    | 586947                                            | 9257890     | 95.7351      |
| 3                                                              | 13.226                                    | 21514                                             | 349020      | 3.6092       |
| <b>Total</b>                                                   |                                           | 618942                                            | 9670323     | 100          |
| <b>Purity</b>                                                  | 95.74%                                    |                                                   |             |              |
| <b>Suggested Solvent<br/>(or solvent used in purification)</b> | 1.0 mg peptide dissolve with 1ml DMSO     |                                                   |             |              |
| <b>Form</b>                                                    | Lyophilized powder                        |                                                   |             |              |
| <b>Manufacture Date</b>                                        | 2023-9-27                                 |                                                   |             |              |
| <b>Recommended</b>                                             | Short term                                | 4 $^{\circ}$ C, one week from the date of receipt |             |              |

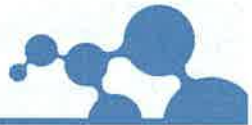

|                |                                                                                                                                                                                                                                                                                                                                                                        |                                                  |
|----------------|------------------------------------------------------------------------------------------------------------------------------------------------------------------------------------------------------------------------------------------------------------------------------------------------------------------------------------------------------------------------|--------------------------------------------------|
| <b>Storage</b> | Long term                                                                                                                                                                                                                                                                                                                                                              | -20 to -80 °C, 6 months from the date of receipt |
| <b>Notes</b>   | <p>The shelf life is related to many factors, storage state, storage temperature and the stability of the peptide itself. The above shelf lives are concluded by our current storage experience. The specific shelf life will depend on specific peptide.</p> <p>Please use as soon as possible after receiving. Repeated freezing and thawing is not recommended.</p> |                                                  |

## MASS SPECTROMETRY REPORT

### MASS Sample Description

|                           |                            |
|---------------------------|----------------------------|
| <b>Analyzed date</b>      | 2023-9-27                  |
| <b>Analyst</b>            | Shen                       |
| <b>Sample</b>             | CSB-DT1057                 |
| <b>M.W.</b>               | 4739.57Da                  |
| <b>Lot. No.</b>           | M0926P1                    |
| <b>Instrument</b>         | Agilent-6125B              |
| <b>Probe</b>              | ESI                        |
| <b>Nebulizer Gas Flow</b> | 1.5L/min                   |
| <b>CDL</b>                | -20.0v                     |
| <b>CDL Temp.</b>          | 250°C                      |
| <b>Block Temp.</b>        | 200°C                      |
| <b>Probe Bias</b>         | + 4.5kv                    |
| <b>Detector</b>           | 1.5kv                      |
| <b>T. Flow</b>            | 0.2ml/min                  |
| <b>B. Conc.</b>           | 50%H <sub>2</sub> O/50%ACN |

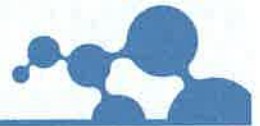

## HPLC

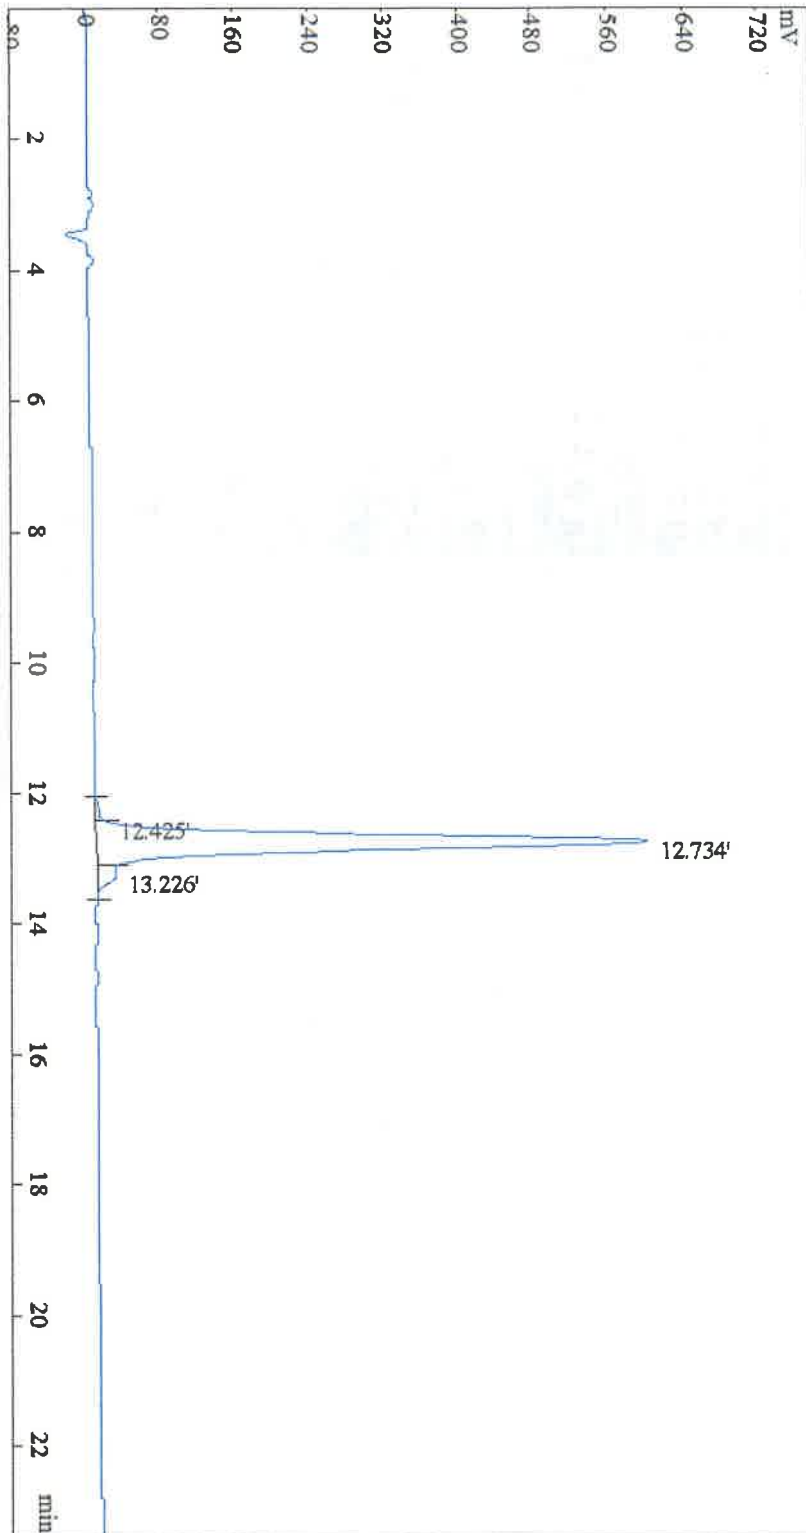

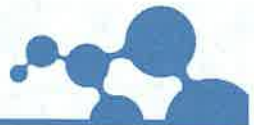

# MASS

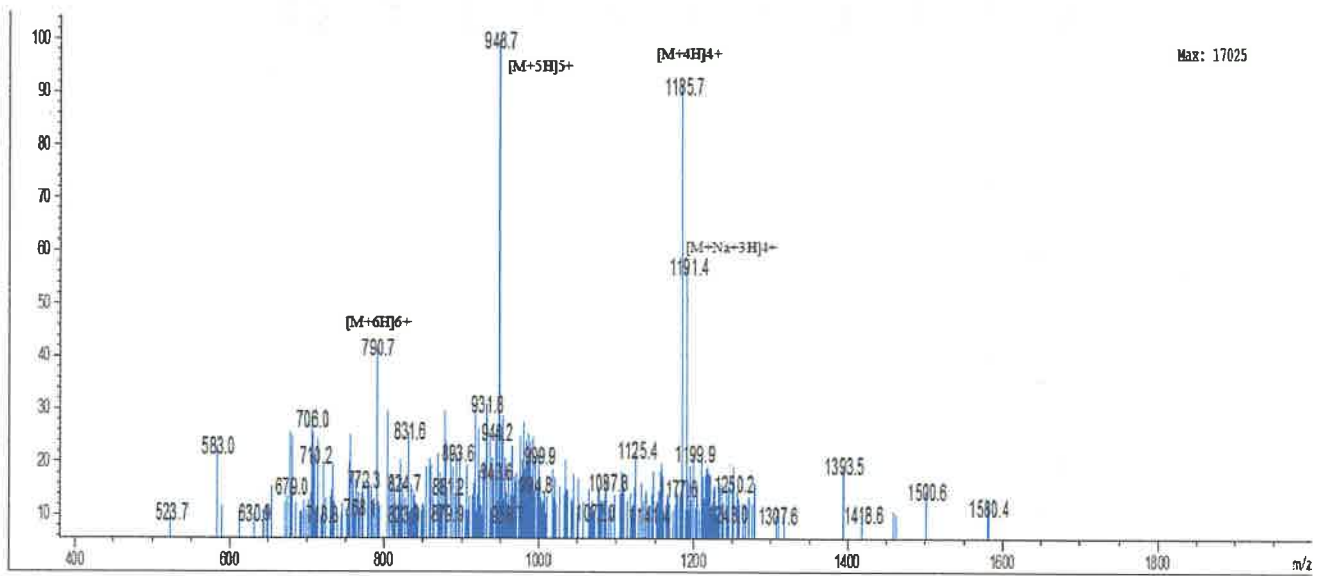

Supplement: Supplementary file [file ccabb09459910904f75f2d30.pdf]
